# Supplementary material for: Axial modulation of Fe sites realizing high-performance oxygen reduction reaction of FeN4catalysts
Source: Royal Society of Chemistry journal article supplement (doi:10.1039/d2ta10062b), 2023-01-01
Supplement: d2ta10062b1.pdf [file d2ta10062b1.pdf]

## ***Supporting information***

### **Axial modulation of Fe sites realizing high-performance oxygen reduction reaction of FeN<sub>4</sub> catalysts**

Yu Zhang,<sup>[a,b]</sup> Caixia Li,<sup>\*[a,c]</sup> Jin Li,<sup>[a,b]</sup> Xiaoni Liu,<sup>[a,c]</sup> Guangjiu Li,<sup>[b]</sup> Bin Li<sup>[a]</sup> and Lei Wang<sup>\*[a, b, c]</sup>

*<sup>a</sup> State Key Laboratory Base of Eco-Chemical Engineering, International Science and Technology Cooperation Base of Eco-chemical Engineering and Green Manufacturing, Qingdao University of Science and Technology, Qingdao 266042, P. R. China.*

*<sup>b</sup> College of Chemistry and Molecular Engineering, Qingdao University of Science and Technology, Qingdao 266042, China.*

*<sup>c</sup> Shandong Engineering Research Center for Marine Environment Corrosion and Safety Protection, College of Environment and Safety Engineering, Qingdao University of Science and Technology, Qingdao, 266042, P. R. China.*

***\*Corresponding Author:***

\*E-mail: licaixia91@126.com (C. Li),

\*E-mail: inorchemwl@126.com (L. Wang)

## **Table of Contents**

1. Chemicals and Reagents
2. Apparatus and Measurements
3. Oxygen Reduction Reaction Measurements
4. Construction of Zn-Air Batteries
5. Supporting Figures and Tables

## ***1. Chemicals and Reagents***

| Chemicals                                                                              | Purity      | Company                                       |
|----------------------------------------------------------------------------------------|-------------|-----------------------------------------------|
| Aluminum nitrate nonahydrate ( $\text{Al}(\text{NO}_3)_3 \cdot 9\text{H}_2\text{O}$ )  | 99.9%       | Shanghai Aladdin Bio-Chem Technology Co., LTD |
| Iron(III) nitrate nonahydrate ( $\text{Fe}(\text{NO}_3)_3 \cdot 9\text{H}_2\text{O}$ ) | 98.5%       | Sinopharm Chemical Reagent Co., Ltd           |
| 1,4-Naphthalenedicarboxylic acid                                                       | 95%         | Shanghai Aladdin Bio-Chem Technology Co., LTD |
| Hydrofluoric acid (HF)                                                                 | $\geq 40\%$ | Sinopharm Chemical Reagent Co., Ltd           |
| Zinc acetate                                                                           | 99%         | Sinopharm Chemical Reagent Co., Ltd           |
| Potassium hydroxide (KOH)                                                              | $\geq 85\%$ | Sinopharm Chemical Reagent Co., Ltd           |
| Nafion                                                                                 | 5 wt. %     | Sigma Aldrich                                 |
| 20% Pt/C powders (HiSPEC 3000)                                                         | 20% Pt      | Alfa Aesar                                    |

De-ionized (DI) water with a specific resistance of  $>18.2 \text{ M}\Omega \cdot \text{cm}$ . All chemicals were purchased and used without further purification.

## ***2. Apparatus and Measurements***

XRD measurements were conducted on a X'Pert PRO MPD instrument. Raman spectra were tested by Invia spectrometer with an excitation laser wavelength of 532 nm. XPS was carried out using VG ESCALABMK II with Al K $\alpha$  radiation (1486.6 eV) photon source. N<sub>2</sub> adsorption and desorption analysis was performed by Micrometrics ASAP 2020 at 77 K. Pore size distributions of samples were calculated by using the non-localized density functional theory (NLDFT) method and mesopore volumes were evaluated by Barrett, Joyner and Halenda (BJH) method. Morphologies of samples were analyzed by the scanning electron microscope (Hitachi S-8200). The transmission electron microscopic (TEM) and high-annular dark-field scanning TEM (HAADF-STEM) images were collected on JEM-ARM200F and JEM-F200. The ICP and elemental analyses were performed by Agilent 730 and Elementar UNICUBE, for ICP and elemental analysis, respectively. Fe K-edge analysis was performed with Si(111) crystal monochromators at the BL11B beamlines at the Shanghai Synchrotron

Radiation Facility (SSRF) (Shanghai, China). Before the analysis at the beamline, samples were pressed into thin sheets with 1 cm in diameter and sealed using Kapton tape film. The XAFS spectra were recorded at room temperature using a 4-channel Silicon Drift Detector (SDD) Bruker 5040. Fe K-edge extended X-ray absorption fine structure (EXAFS) spectra were recorded in transmission mode. Negligible changes in the line-shape and peak position of Fe K-edge XANES spectra were observed between two scans taken for a specific sample. The XAFS spectra of these standard samples (FePC, Fe<sub>2</sub>O<sub>3</sub>, and Fe<sub>3</sub>O<sub>4</sub>) were recorded in transmission mode. The spectra were processed and analyzed by the software codes Athena and Artemis.

### ***3. Oxygen Reduction Reaction Measurements***

The ORR electrochemical measurements were performed on a CHI 760E electrochemical workstation. ORR electrochemical measurements were tested in a conventional three-electrode system at room temperature. A platinum sheet and an Ag/AgCl electrode in saturated aqueous potassium chloride solution were used as counter and reference electrodes, respectively. Different catalysts were dispersed in a mixture of deionized water, isopropanol, and 5 % Nafion solution in the volume ratio of (v:v:v = 5:19:1) and treated by sonication for 45 min to obtain a homogeneous catalyst ink with a concentration of 5 mg mL<sup>-1</sup>. A glassy carbon rotating disk electrode (RDE, 5 mm diameter, 0.196 cm<sup>2</sup> geometric surface area) loaded with catalyst was used as a working electrode. In the ORR test, the loading amount of each catalyst was 0.255 mg cm<sup>-2</sup>. All potentials in this study referred to the reversible hydrogen electrode (RHE,  $E_{\text{RHE}} = E_{\text{Ag/AgCl}} + 0.0592 \text{ pH} + 0.1976 \text{ V}$ ).

In the ORR activity test, LSV curves were recorded in O<sub>2</sub>-saturated 0.1 M potassium hydroxide with a scan rate of 10 mV s<sup>-1</sup> and a speed of 1600 rpm. the Tafel slope (b) was obtained by fitting the linear part according to the following equation:

$$\eta = b \log(j) + a$$

where  $\eta$  and  $j$  are the overpotential (V) and current density (mA cm<sup>-2</sup>), respectively. The electron transfer number ( $n$ ) in the ORR test is determined by the K-L equation as

follows:

$$\frac{1}{j} = \frac{1}{j_k} + \frac{1}{j_l} = \frac{1}{j_k} + \frac{1}{B\omega^{1/2}}$$

$$B = 0.2nFD_0^{2/3}\nu^{-1/6}C_0$$

where  $j$  is the current density,  $j_k$  is the kinetic current density,  $j_l$  is the limiting current density, and  $\omega$  is the angular speed of rotation of the electrode (rpm),  $n$  is the number of electron transfers,  $F$  is Faraday's constant ( $F = 96485 \text{ C mol}^{-1}$ ),  $D_0$  is the  $\text{O}_2$  diffusion coefficient ( $1.9 \times 10^{-5} \text{ cm}^2 \text{ s}^{-1}$ ) in a 0.1 M KOH electrolyte,  $\nu$  is the kinematic viscosity of the electrolyte ( $0.01 \text{ cm}^2 \text{ s}^{-1}$ ), and  $C_0$  is the volume concentration of  $\text{O}_2$  ( $1.2 \times 10^{-6} \text{ mol cm}^{-3}$ )

For RRDE measurement, the working electrodes were prepared by the same process as RDE. The rotation rate was 1600 rpm and ring potential was set at a constant value of 1.2 V vs RHE. The  $\text{H}_2\text{O}_2$  % and electron transfer number were determined by the following equations:

$$\text{H}_2\text{O}_2\% = 200 \times \frac{I_r/N}{I_d + I_r/N}$$

$$n = 4 \times \frac{I_d}{I_d + I_r/N}$$

Where  $I_d$  is the disk current and  $I_r$  is the ring current,  $N$  is the current collection efficiency (0.37) of the Pt ring.

We have employed the VASP <sup>[1, 2]</sup> to perform all the density functional theory (DFT) calculations within the generalized gradient approximation (GGA) using the Perdew-Burke-Ernzerhof (PBE) <sup>[3]</sup> formulation. We have chosen the projected augmented wave (PAW) potentials <sup>[4]</sup> to describe the ionic cores. Take valence electrons into account using a plane wave basis set with a kinetic energy cutoff of 450 eV. Partial occupancies of the Kohn-Sham orbitals were allowed using the Gaussian smearing method and a width of 0.05 eV. The electronic energy was considered self-consistent when the energy change was smaller than  $10^{-5}$  eV. A geometry optimization was considered convergent when the energy change was smaller than 0.03 eV/Å. The brillouin zone is sampled with  $3 \times 3 \times 1$  Gamma kpoints <sup>[5]</sup>. The free energy on surface was calculated as follows:  $\Delta G = E(\text{DFT}) + \Delta E(\text{ZPE}) - T\Delta S$ , where  $E(\text{DFT})$  is the total energy for the adsorption  $\text{OOH}^*$ ,  $\text{OH}^*$  and  $\text{O}^*$ ,  $\Delta E(\text{ZPE})$  is the zero-point energy change and  $\Delta S$  is the entropy

change.

#### ***4. Zn-Air batteries***

For the zinc-air cell, a zinc plate with a thickness of 0.5 mm was used as the anode and a mixture of 6.0 M KOH and 0.2 M Zn(OAc)<sub>2</sub> was used as the electrolyte. For the air cathode, FeN<sub>4</sub>S<sub>1</sub> (10 mg), carbon black (5 mg) and 5 % polytetrafluoroethylene (PTFE) were used. The polytetrafluoroethylene (PTFE) dispersion (20 µL) was first dispersed into isopropyl alcohol (1.0 mL) and dried at 60 °C. The resulting mixture and waterproof breathable film were then pressed onto the two surfaces of nickel foam under ultrasonic treatment. Pt/C as an air cathode was also fabricated as described above. About the performance test of Zn-air cell. We performed polarization curve tests on an electrochemical workstation (CHI 760E) and collected charge/discharge curves on a LANHE CT2001. The cycle tests were performed at a current density of 10 mA cm<sup>-2</sup> for 20 minutes per cycle, each cycle consisting of 10 minutes of charging and 10 minutes of discharging.

## 5. Supporting Figures and Tables

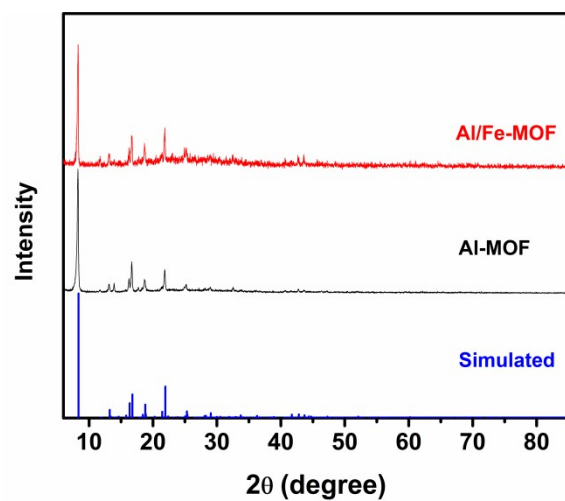

**Figure S1.** XRD patterns of Al-MOF, Al/Fe-MOF and Al-MOF (simulated).

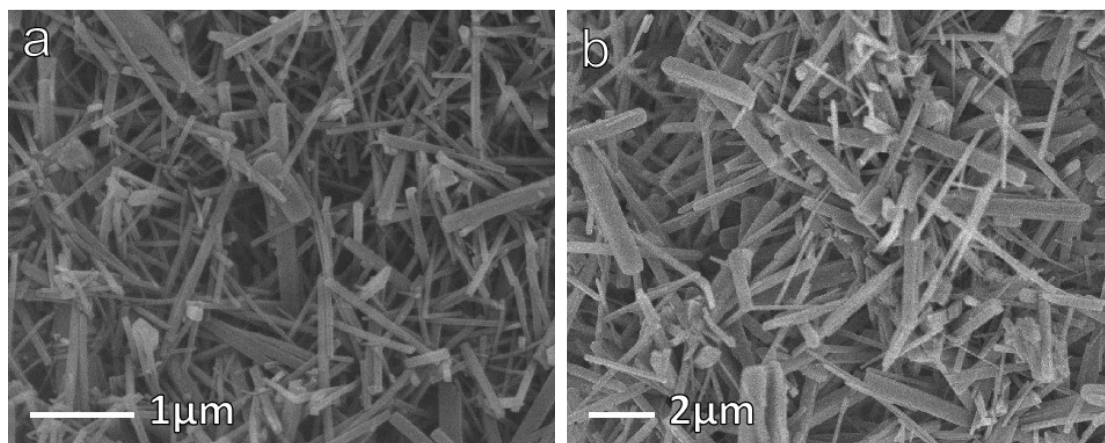

**Figure S2.** The SEM images of (a) Al-MOF and (b) Al/Fe-MOF.

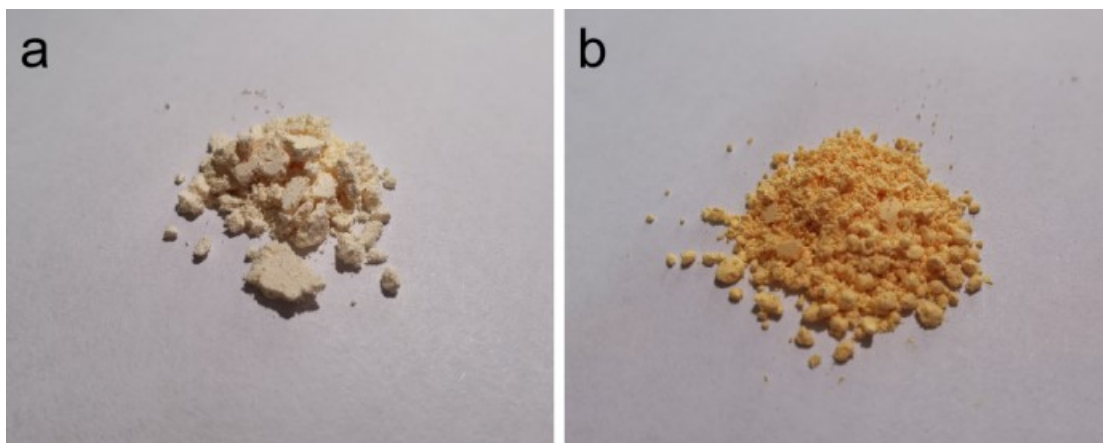

**Figure S3.** The photograph of (a) Al-MOF and (b) Al/Fe-MOF.

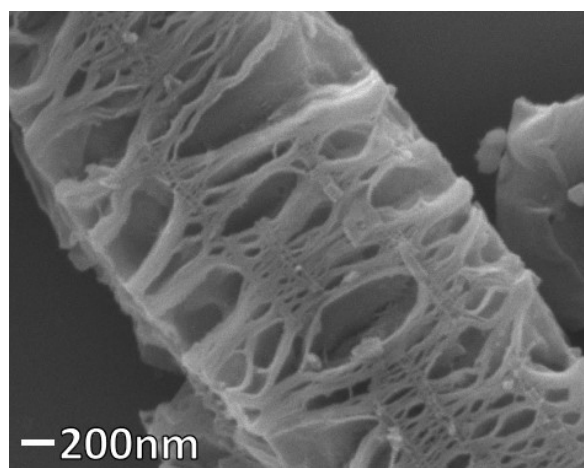

**Figure S4.** The SEM image of Fe-N<sub>4</sub>S<sub>1</sub>.

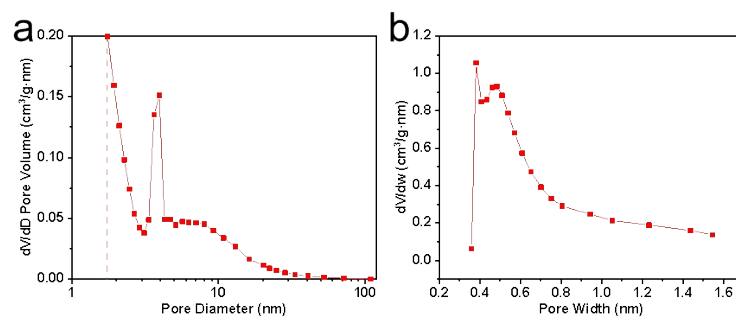

**Figure S5.** Pore size distribution of Fe-N<sub>4</sub>S<sub>1</sub> sample.

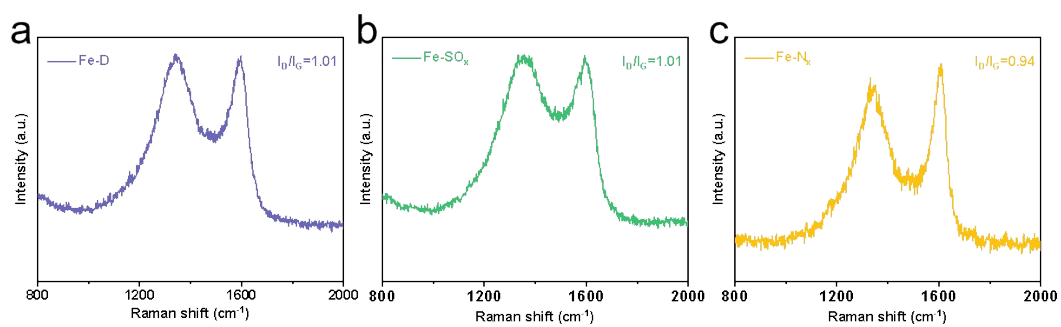

**Figure S6.** The Raman spectra of (a) Fe-D, (b) Fe-SO<sub>x</sub> and (c) Fe-N<sub>x</sub>.

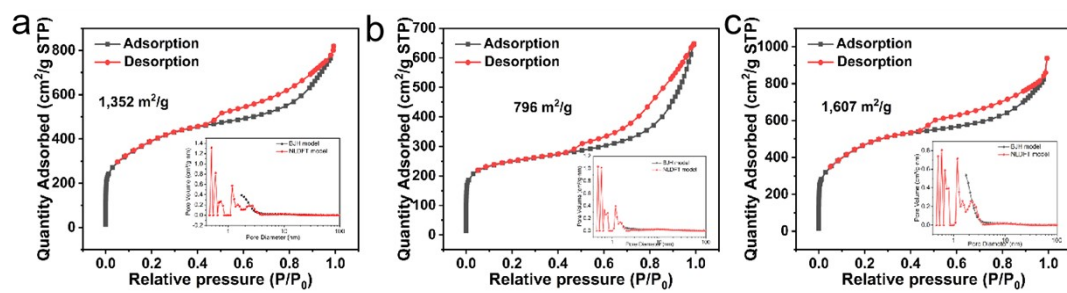

**Figure S7.**  $N_2$  adsorption and desorption curves of (a) Fe-D, (b) Fe-SO<sub>x</sub>, (c) Fe-N<sub>x</sub>.

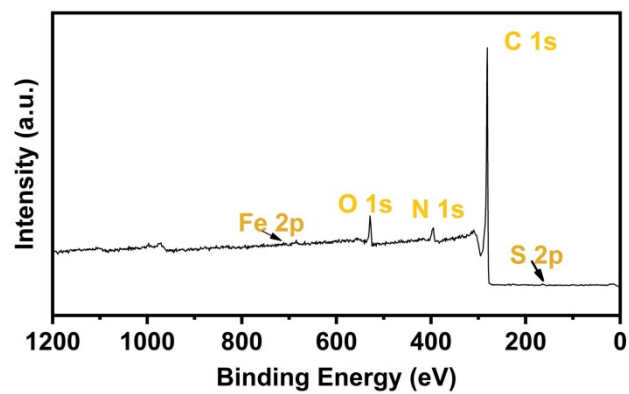

**Figure S8.** Full spectrum of XPS of Fe-N<sub>4</sub>S<sub>1</sub> samples.

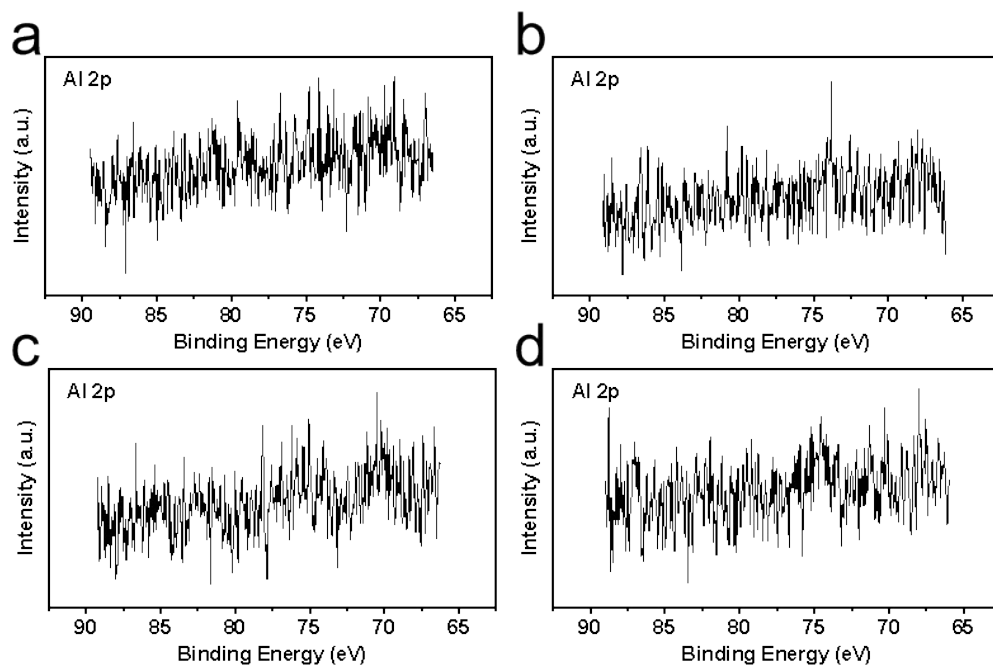

**Figure S9.** XPS curves of Al 2p for (a) Fe-D, (b) Fe-SO<sub>x</sub>, (c) Fe-N<sub>x</sub> and (d) Fe-N<sub>4</sub>S<sub>1</sub>.

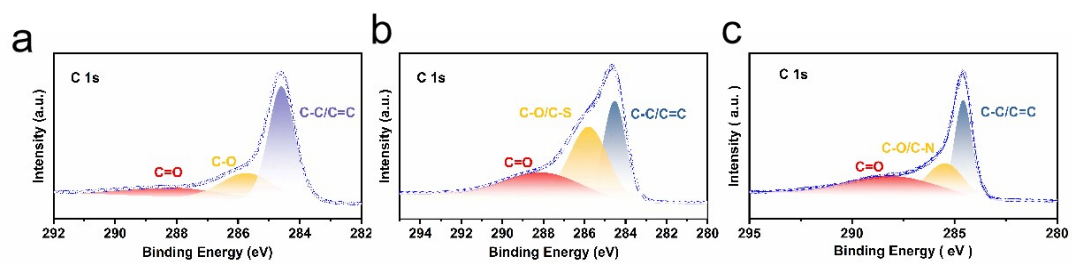

**Figure S10.** XPS curves of C 1s for (a) Fe-D, (b) Fe-SO<sub>x</sub> and (c) Fe-N<sub>x</sub>.

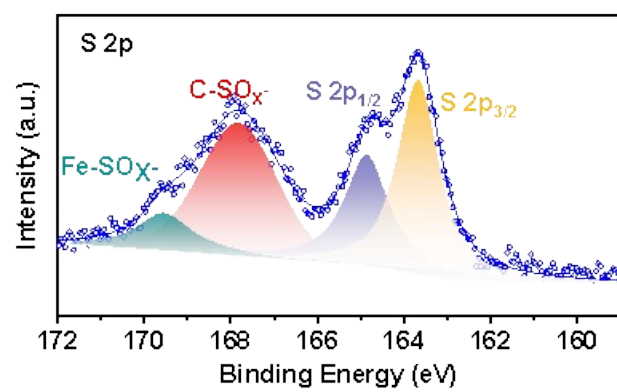

**Figure S11.** XPS curves of S 2p for Fe-SO<sub>x</sub>.

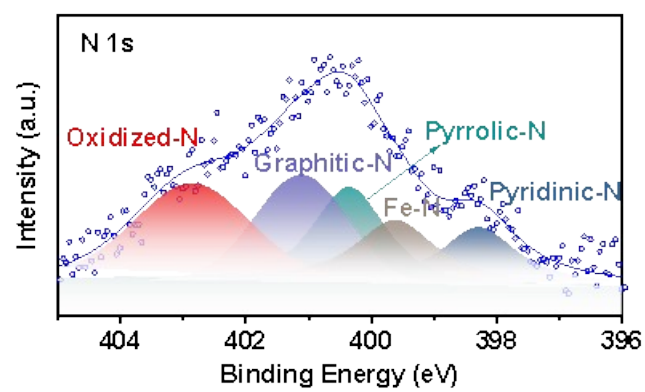

**Figure S12.** XPS curves of N 1s for Fe-N<sub>x</sub>.

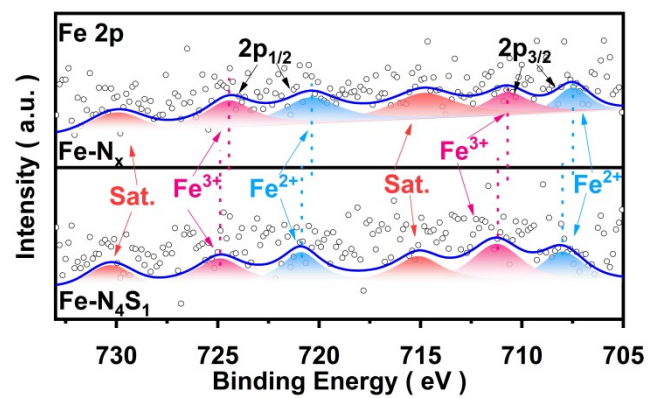

**Figure 13.** XPS curves of Fe 2p for Fe-N<sub>4</sub>S<sub>1</sub> and Fe-N<sub>x</sub>.

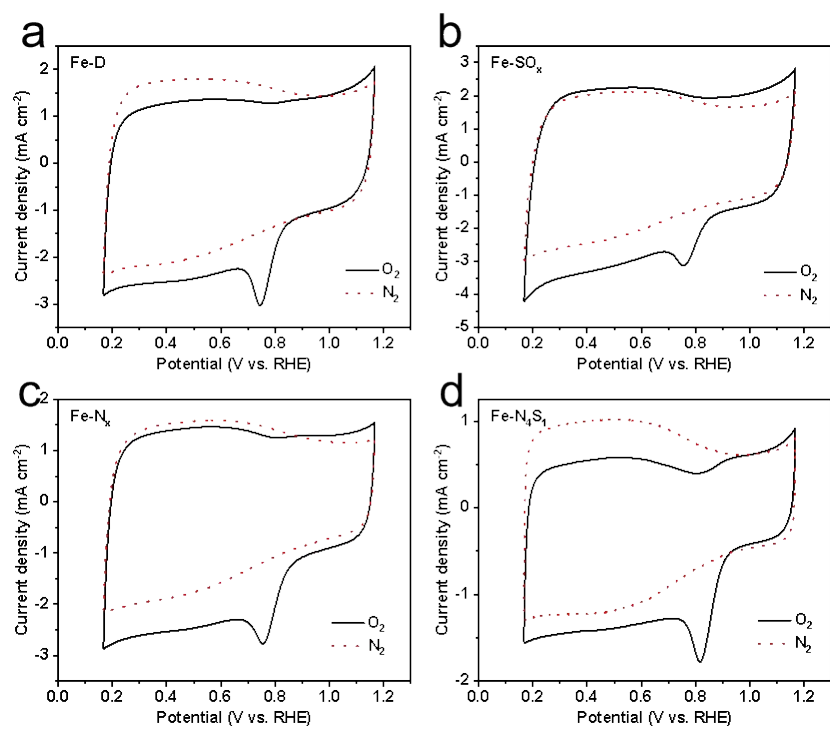

**Figure S14.** CV curves of Fe-N<sub>4</sub>S<sub>1</sub> and comparison samples in O<sub>2</sub> and N<sub>2</sub>-saturated 0.1 M KOH.

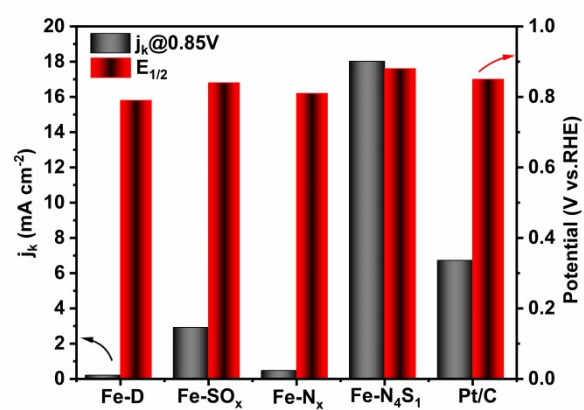

**Figure S15.** Kinetic current density ( $j_k@0.85$  V) and  $E_{1/2}$  of Fe-N<sub>4</sub>S<sub>1</sub> and comparison samples.

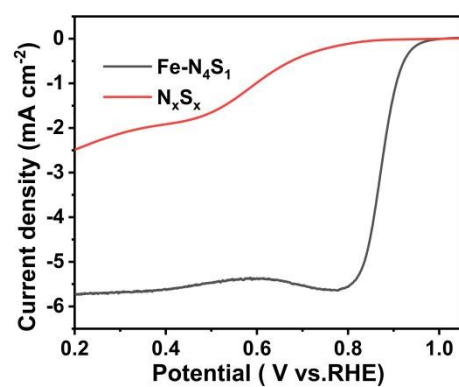

**Figure S16.** ORR performances in 0.1 M KOH. LSV curves of Fe-N<sub>4</sub>S<sub>1</sub> and N<sub>x</sub>S<sub>x</sub>.

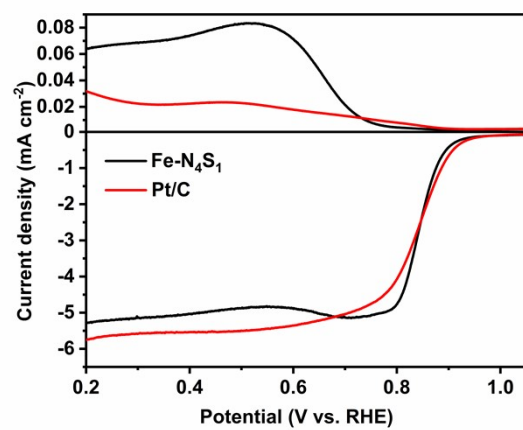

**Figure S17.** RRDE polarization curves of Fe-N<sub>4</sub>S<sub>1</sub> and Pt/C at 1600 rpm with a scan rate of 10 mV s<sup>-1</sup>.

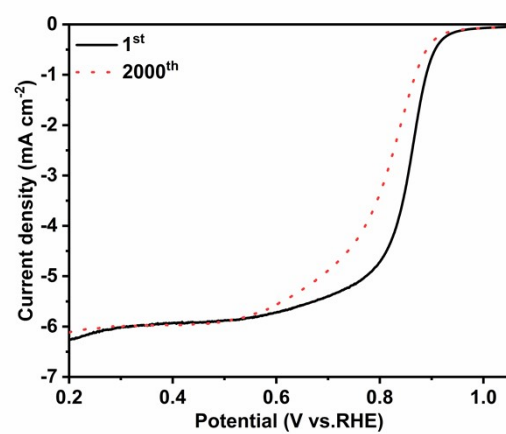

**Figure S18.** ORR polarization curves before and after 2000 potential cycles for Pt/C.

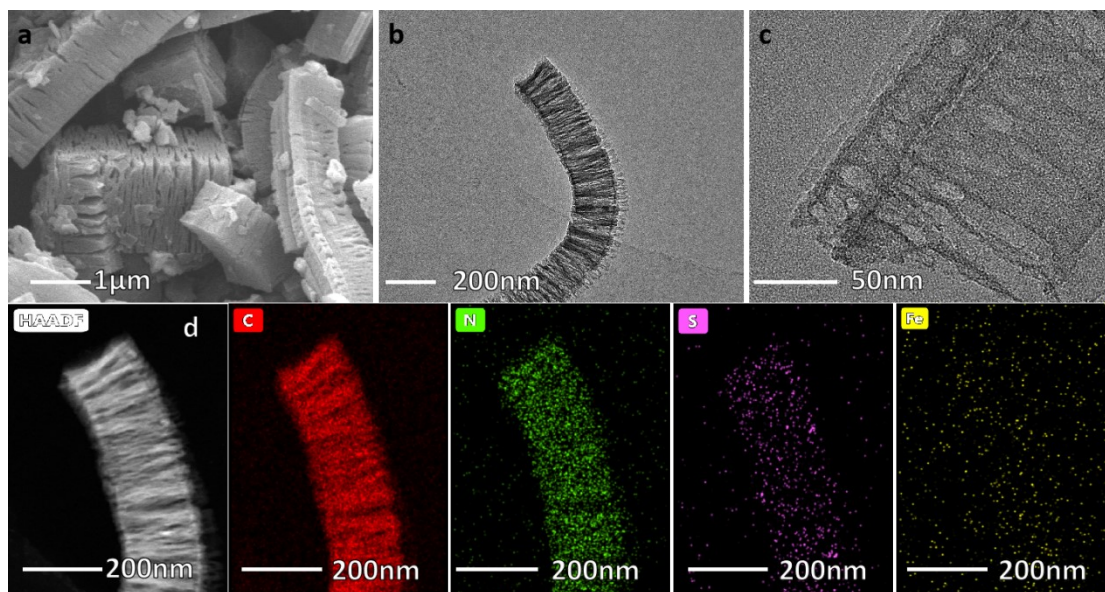

**Figure S19** Morphological characterization of Fe-N<sub>4</sub>S<sub>1</sub> samples after stabilization. (a) SEM and (b, c) TEM images of Fe-N<sub>4</sub>S<sub>1</sub>. (d) HAADF-STEM and the elemental mapping of C, N, S and Fe.

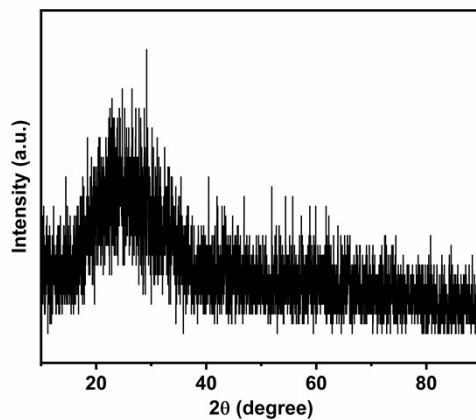

**Figure S20.** XRD characterization of Fe-N<sub>4</sub>S<sub>1</sub> samples after stabilization.

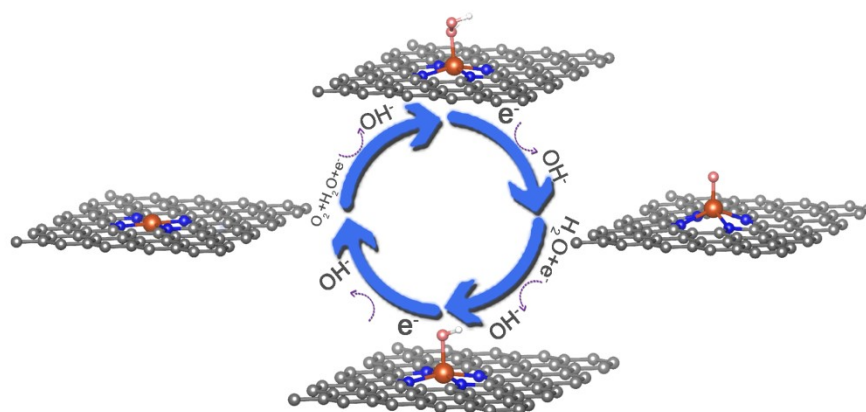

**Figure S21.** Reaction scheme with intermediates in the ORR process on Fe-N<sub>4</sub>.

**Table S1.** ICP of S and Fe elements in the sample.

| Samples                          | Element | Quality Score (%) |
|----------------------------------|---------|-------------------|
| Fe-D                             | Fe      | 0.0244            |
| Fe-S                             | Fe      | 2.8805            |
| Fe-N <sub>x</sub>                | Fe      | 0.0143            |
| Fe-N <sub>4</sub> S <sub>1</sub> | Fe      | 1.4495            |
| Fe-S                             | S       | 4.4359            |
| Fe-N <sub>4</sub> S <sub>1</sub> | S       | 0.5272            |

**Table S2.** Structural parameters extracted from EXAFS data fitting of ( $S_0^2 = 1$ )

|                                      | <b>Bond type</b> | <b>N</b> | <b>R (<math>\text{\AA}^2</math>)</b> | <b><math>\sigma^2(\text{\AA}^2)</math></b> | <b>R-factor</b> |
|--------------------------------------|------------------|----------|--------------------------------------|--------------------------------------------|-----------------|
| <b>Fe-N<sub>4</sub>S<sub>1</sub></b> | Fe-N             | 4        | 1.96                                 | 0.00505                                    | 0.014           |
|                                      | Fe-S             | 1        | 2.28                                 | 0.00113                                    |                 |

**Table S3.** ORR performance comparison in 0.1 M KOH.

| <b>Catalyst</b>                  | <b>E<sub>onset</sub>(V vs.RHE)</b> | <b>E<sub>1/2</sub>(V vs.RHE)</b> | <b>References</b> |
|----------------------------------|------------------------------------|----------------------------------|-------------------|
| Fe-N <sub>4</sub> S <sub>1</sub> | 0.96                               | 0.88                             | This work         |
| Fe-D                             | 0.86                               | 0.79                             | This work         |
| Fe-S                             | 0.92                               | 0.84                             | This work         |
| Fe-N                             | 0.88                               | 0.81                             | This work         |
| PCN-226(Co)                      | 0.83 V                             | 0.75 V                           | [6]               |
| Co-N-C (A)                       | --                                 | 0.89 V                           | [7]               |
| CoSe <sub>2</sub> @NC            | 0.904 V                            | 0.83 V                           | [8]               |
| CoFe/S-N-C                       | --                                 | 0.855 V                          | [9]               |
| FePc&rGO                         | 0.98 V                             | 0.89 V                           | [10]              |
| Co-SAC/NC                        | 1.019 V                            | 0.884 V                          | [11]              |
| Fe/OES                           | 1.0 V                              | 0.85 V                           | [12]              |
| NiFe@C@Co<br>CNFs                | 0.94 V                             | 0.87 V                           | [13]              |
| CoN <sub>3</sub> C <sub>1</sub>  | 0.904 V                            | 0.824 V                          | [14]              |
| Ni-N <sub>4</sub>                | 0.97 V                             | 0.86 V                           | [15]              |
| CuZn/NC                          | 0.982 V                            | 0.884 V                          | [16]              |
| N-CNSP                           | 0.96 V                             | 0.85 V                           | [17]              |
| Fe <sup>2+</sup> @NCS-A          | 0.94 V                             | 0.79 V                           | [18]              |
| Co/MnO@NC                        | 0.96 V                             | 0.83 V                           | [19]              |
| NPCS-900                         | 0.99 V                             | 0.87 V                           | [20]              |
| Fe-N/GNs                         | 0.903 V                            | 0.837 V                          | [21]              |
| Cu SAs/NC-900                    | --                                 | 0.87 V                           | [22]              |
| Co-pyridinic N-C                 | 0.99 V                             | 0.87 V                           | [23]              |
| PSTA-Co-1000                     | --                                 | 0.878 V                          | [24]              |

**Table S4.** Calculated  $\Delta G$  for 4e<sup>-</sup> ORR pathway on Fe-N<sub>4</sub> and Fe-N<sub>4</sub>S<sub>1</sub> at U = 0 V vs.

| U = 0 V                          | O <sub>2</sub> (eV) | OOH*(eV) | O* (eV)  | OH* (eV) | OH <sup>-</sup> (eV) |
|----------------------------------|---------------------|----------|----------|----------|----------------------|
| Fe-N <sub>4</sub> S <sub>1</sub> | 4.92                | 4.327813 | 3.2137   | 1.133447 | 0                    |
| Fe-N <sub>4</sub>                | 4.92                | 3.687101 | 1.453058 | 0.515673 | 0                    |

**Table S5.** Calculated  $\Delta G$  for 4e<sup>-</sup> ORR pathway on Fe-N<sub>4</sub> and Fe-N<sub>4</sub>S<sub>1</sub> at U = 1.23 V.

| U = 1.23 V                       | O <sub>2</sub> (eV) | OOH*(eV) | O* (eV)  | OH* (eV) | OH <sup>-</sup> (eV) |
|----------------------------------|---------------------|----------|----------|----------|----------------------|
| Fe-N <sub>4</sub> S <sub>1</sub> | 0                   | -0.0029  | -1.00694 | -0.71433 | 0                    |
| Fe-N <sub>4</sub>                | 0                   | 0.637813 | 0.7537   | -0.09655 | 0                    |

## References

- [1] G. Kresse, J. Furthmüller, *Phys. Rev.*, 1996, **54**, 11169.
- [2] T. Björkman, *Comput Phys Commun.*, 2011, **182**, 1183-1186.
- [3] J.P. Perdew, K. Burke, M. Ernzerhof, *Phys. Rev. Lett.*, 1996, **77**, 3865.
- [4] L. Schimka, J. Harl, A. Stroppa, A. Grüneis, M. Marsman, F. Mittendorfer, G. Kresse, *Nat. Mater.*, 2010, **9**, 741-744.
- [5] H.J. Monkhorst, J.D. Pack, *Phys. Rev. B*, 1976, **13**, 5188.
- [6] M.O. Cichocka, Z. Liang, D. Feng, S. Back, S. Siahrostami, X. Wang, L. Samperi, Y. Sun, H. Xu, N. Hedin, *J. Am. Chem. Soc.*, 2020, **142**, 15386-15395.
- [7] J. Gao, Y. Hu, Y. Wang, X. Lin, K. Hu, X. Lin, G. Xie, X. Liu, K.M. Reddy, Q. Yuan, *Small*, 2021, **17**, 2104684.
- [8] K. Ding, J. Hu, J. Luo, W. Jin, L. Zhao, L. Zheng, W. Yan, B. Weng, H. Hou, X. Ji, *Nano Energy*, 2022, **91**, 106675.
- [9] G. Li, Y. Tang, T. Fu, Y. Xiang, Z. Xiong, Y. Si, C. Guo, Z. Jiang, *Chem. Eng. J.*, 2022, **429**, 132174.
- [10] Z.-y. Mei, S. Cai, G. Zhao, Q. Jing, X. Sheng, J. Jiang, H. Guo, *Energy Stor. Mater.*, 2022, **50**, 12-20.
- [11] P. Rao, J. Luo, D. Wu, J. Li, Q. Chen, P. Deng, Y. Shen, X. Tian, *Energy Environ. Sci.*, 2022.
- [12] C.C. Hou, L. Zou, L. Sun, K. Zhang, Z. Liu, Y. Li, C. Li, R. Zou, J. Yu, Q. Xu, *Angew. Chem. Int. Ed.*, 2020, **132**, 7454-7459.
- [13] X. Chen, J. Pu, X. Hu, Y. Yao, Y. Dou, J. Jiang, W. Zhang, *Small*, 2022, **18**, 2200578.
- [14] X. Hai, X. Zhao, N. Guo, C. Yao, C. Chen, W. Liu, Y. Du, H. Yan, J. Li, Z. Chen, *ACS Catal.*, 2020, **10**, 5862-5870.
- [15] Z. Cai, P. Du, W. Liang, H. Zhang, P. Wu, C. Cai, Z. Yan, *J. Mater. Chem. A*, 2020, **8**, 15012-15022.
- [16] D. Qi, Y. Liu, M. Hu, X. Peng, Y. Qiu, S. Zhang, W. Liu, H. Li, G. Hu, L. Zhuo, *Small*, 2020, **16**, 2004855.
- [17] L. Zong, W. Wu, S. Liu, H. Yin, Y. Chen, C. Liu, K. Fan, X. Zhao, X. Chen, F. Wang, *Energy Stor. Mater.*, 2020, **27**, 514-521.
- [18] J. Feng, R. Cai, E. Magliocca, H. Luo, L. Higgins, G.L.F. Romario, X. Liang, A. Pedersen, Z. Xu, Z. Guo, *Adv. Funct. Mater.*, 2021, **31**, 2102974.
- [19] Y. Niu, X. Teng, S. Gong, X. Liu, M. Xu, Z. Chen, *Energy Stor. Mater.*, 2021, **43**, 42-52.
- [20] G. Ren, S. Chen, J. Zhang, N. Zhang, C. Jiao, H. Qiu, C. Liu, H.-L. Wang, *J. Mater. Chem. A*, 2021, **9**, 5751-5758.
- [21] D. Liu, J.C. Li, S. Ding, Z. Lyu, S. Feng, H. Tian, C. Huyan, M. Xu, T. Li, D. Du, *Small Methods*, 2020, **4**, 1900827.
- [22] S. Ma, Z. Han, K. Leng, X. Liu, Y. Wang, Y. Qu, J. Bai, *Small*, 2020, **16**, 2001384.
- [23] Y. Ha, B. Fei, X. Yan, H. Xu, Z. Chen, L. Shi, M. Fu, W. Xu, R. Wu, *Adv. Energy Mater.*, 2020, **10**, 2002592.

[24] X. Wei, D. Zheng, M. Zhao, H. Chen, X. Fan, B. Gao, L. Gu, Y. Guo, J. Qin, J. Wei, *Angew. Chem. Int. Ed.*, 2020, **132**, 14747-14754.
